# Supplementary material for: Hydrothermal synthesis and crystal structures of two bimetallic chain-like and cluster complexes [{Co(phen)2}2V6O17]n and [{Cu(phen)2}4V10O29]·6H2O
Source: Royal Society of Chemistry journal article supplement (doi:10.1039/b005880g), 2000-01-01
Supplement: b005880g.doc [file b005880g.doc]

**Fig. 1S** Molecular packing in **1** viewed along *a*-axis direction.

**Fig.2S** Molecular packing in **2** viewed along *a*-axis direction

**Fig.3S** Molecular packing in **2** viewed along *b*-axis direction
